# Supplementary material
Source: PubMed Central journal article supplement (PMC8643075)
Supplement: NIHMS1760298-supplement-Supporting_Information.pdf [file NIHMS1760298-supplement-Supporting_Information.pdf]

## Supplementary Information

### **Spectroscopic Investigation of Iron(III) Cysteamine Dioxygenase in the Presence of Substrate (Analogues): Implications for the Nature of Substrate-Bound Reaction Intermediates**

Rebeca L. Fernandez,<sup>1</sup> Nicholas D. Juntunen,<sup>1</sup> Brian G. Fox,<sup>2</sup> and Thomas C. Brunold<sup>1\*</sup>

*<sup>1</sup>Department of Chemistry, University of Wisconsin-Madison, Madison, Wisconsin 53706, United States*

*<sup>2</sup>Department of Biochemistry, University of Wisconsin-Madison, Madison, Wisconsin 53706, United States*

\* Corresponding author: [brunold@chem.wisc.edu](mailto:brunold@chem.wisc.edu)

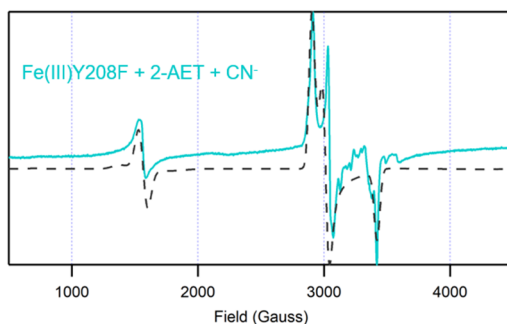

**Figure S1.** X-band EPR spectra at 20 K of Y208F Fe(III)ADO incubated with a 10-fold excess of cyanide in the presence of a 15-fold excess of 2-AET. An EPR spectral simulation (dashed line) is overlaid on the experimental spectrum (solid line) for comparison. Fit parameters are provided in Table S1.

**Table S1.** Parameters used to fit experimental EPR spectra via EasySpin (Version 5.2.25)<sup>1</sup>

| Samples                                                | Species         | Percent | $g_1$ | $g_2$ | $g_3$ | E/D  | D (cm <sup>-1</sup> ) |
|--------------------------------------------------------|-----------------|---------|-------|-------|-------|------|-----------------------|
| <i>Fe<sup>III</sup> ADO</i>                            | Major high-spin | 85      | 2     | 1.99  | 1.99  | 0.28 | 4.19                  |
|                                                        | Minor high-spin | 15      | 1.99  |       |       | 0.33 | 1.44                  |
| <i>Fe<sup>III</sup> ADO with azide</i>                 | Major high-spin | 85      | 2     | 1.99  | 1.99  | 0.28 | 4.19                  |
|                                                        | Minor high-spin | 15      | 1.99  |       |       | 0.33 | 1.44                  |
| <i>2-AET-bound Fe<sup>III</sup> ADO</i>                | Major high-spin | 92      | 2.1   | 2.00  | 1.99  | 0.25 | 4.24                  |
|                                                        | Minor high-spin | 8       | 2.00  |       |       | 0.33 | 1.52                  |
| <i>2-AET-bound Fe<sup>III</sup> ADO with azide</i>     | Major high-spin | 84      | 2.01  | 2.00  | 1.99  | 0.28 | 4.34                  |
|                                                        | Minor high-spin | 6       | 2.01  |       |       | 0.33 | 1.63                  |
|                                                        | Minor low-spin  | 10      | 2.38  | 2.28  | 1.92  |      |                       |
| <i>3-MPA-bound Fe<sup>III</sup> ADO with azide</i>     | Major high-spin | 85      | 2.01  | 1.99  | 1.99  | 0.28 | 4.19                  |
|                                                        | Minor high-spin | 15      | 1.99  |       |       | 0.33 | 1.44                  |
| <i>Cys-bound Fe<sup>III</sup> ADO with azide</i>       | Major high-spin | 88      | 2.001 | 2.00  | 1.99  | 0.28 | 4.19                  |
|                                                        | Minor high-spin | 9       | 2.01  |       |       | 0.33 | 1.63                  |
|                                                        | Minor low-spin  | 3       | 2.38  | 2.28  | 1.92  |      |                       |
| <i>Fe<sup>III</sup> ADO with cyanide</i>               | Major high-spin | 75      | 1.99  | 1.99  | 2.00  | 0.26 | 1.47                  |
|                                                        | Minor high-spin | 25      | 1.99  |       |       | 0.33 | 1.44                  |
| <i>2-AET-bound Fe<sup>III</sup> ADO with cyanide</i>   | Minor high-spin | 12      | 2.10  | 2.00  | 2.00  | 0.24 | 4.29                  |
|                                                        | Minor high-spin | 8       | 2.00  |       |       | 0.33 | 1.52                  |
|                                                        | Major low-spin  | 80      | 2.31  | 2.19  | 1.96  |      |                       |
| <i>Cys-bound Fe<sup>III</sup> ADO with cyanide</i>     | Minor high-spin | 14      | 2.10  | 2.00  | 2.00  | 0.26 | 3.37                  |
|                                                        | Minor high-spin | 6       | 2.00  |       |       | 0.32 | 1.63                  |
|                                                        | Major low-spin  | 80      | 2.31  | 2.19  | 1.96  |      |                       |
| <i>3-MPA-bound Fe<sup>III</sup> ADO with cyanide</i>   | Major high-spin | 64      | 2.10  | 2.03  | 1.99  | 0.25 | 4.25                  |
|                                                        | Minor high-spin | 8       | 2.00  |       |       | 0.33 | 1.52                  |
|                                                        | Minor low-spin  | 28      | 2.33  | 2.22  | 1.93  |      |                       |
| <i>2-AET-bound Fe<sup>III</sup> Y208F with cyanide</i> | Minor high-spin | 12      | 2.1   | 2.01  | 2.01  | 0.24 | 4.29                  |
|                                                        | Minor high-spin | 8       | 2     |       |       | 0.33 | 1.52                  |
|                                                        | Major low-spin  | 80      | 2.31  | 2.19  | 1.96  |      |                       |

## References

(1) Stoll, S., and Schweiger, A. (2006) EasySpin, a comprehensive software package for spectral simulation and analysis in EPR. *J. Magn. Reson.* 178, 42–55.
